# Supplementary material for: Automated model building and protein identification in cryo-EM maps
Source: PubMed Central journal article supplement (PMC11006616; doi:10.1038/s41586-024-07215-4), 2024-02-26
Supplement: 41586_2024_7215_MOESM1_ESM.pdf [file 41586_2024_7215_MOESM1_ESM.pdf]

## Supplementary information

---

# Automated model building and protein identification in cryo-EM maps

---

In the format provided by the authors and unedited

# Automated model building and protein identification in cryo-EM maps

Kiarash Jamali <sup>1\*</sup>, Lukas Käll <sup>2</sup>, Rui Zhang <sup>3</sup>,  
Alan Brown <sup>4</sup>, Dari Kimanius <sup>1\*</sup> & Sjors H.W. Scheres <sup>1\*</sup>

<sup>1</sup> MRC Laboratory of Molecular Biology,  
Cambridge, UK

<sup>2</sup> Science for Life Laboratory, KTH Royal Institute of Technology,  
Stockholm, Sweden

<sup>3</sup> Washington University in St. Louis,  
St. Louis, MO, USA

<sup>4</sup> Blavatnik Institute, Harvard Medical School,  
Boston, MA, USA

\* Correspondence to {kjamali,dari,scheres}@mrc-lmb.cam.ac.uk

## List of all EMDB/PDB entries in the first test set of 177 structures.

Entries in bold are also part of the second test set of 27 structures.

| EMDB entry | PDB code | Reported resolution |
|------------|----------|---------------------|
| emd-26595  | 7ulw     | 3.10                |
| emd-26608  | 7ums     | 3.50                |
| emd-26616  | 7un8     | 3.30                |
| emd-26617  | 7un9     | 3.30                |
| emd-26701  | 7uqx     | 3.30                |
| emd-26702  | 7uqy     | 3.00                |
| emd-26712  | 7urg     | 3.46                |
| emd-26732  | 7usc     | 3.00                |
| emd-26733  | 7usd     | 3.00                |
| emd-26734  | 7use     | 3.00                |

| EMDB entry       | PDB code    | Reported resolution |
|------------------|-------------|---------------------|
| emd-26742        | 7usx        | 3.09                |
| emd-26743        | 7usy        | 3.54                |
| emd-26754        | 7ut4        | 3.90                |
| emd-26756        | 7ut6        | 1.91                |
| emd-26757        | 7ut7        | 1.91                |
| emd-26760        | 7ut8        | 2.43                |
| emd-26763        | 7ut9        | 2.44                |
| emd-26770        | 7uth        | 3.90                |
| emd-26782        | 7utn        | 2.74                |
| emd-26801        | 7uur        | 1.67                |
| emd-26838        | 7uwq        | 3.05                |
| emd-26841        | 7uws        | 3.47                |
| emd-26858        | 7uxe        | 3.38                |
| emd-26886        | 7uze        | 2.40                |
| emd-26916        | 7uzq        | 2.17                |
| <b>emd-26917</b> | <b>7uzs</b> | <b>2.20</b>         |
| <b>emd-26948</b> | <b>7v0q</b> | <b>2.50</b>         |
| emd-26949        | 7v0s        | 2.50                |
| <b>emd-33187</b> | <b>7xgr</b> | <b>2.60</b>         |
| emd-33192        | 7xha        | 3.35                |
| emd-33193        | 7xhb        | 3.33                |
| <b>emd-33233</b> | <b>7xjp</b> | <b>2.71</b>         |
| emd-33242        | 7xk3        | 3.10                |
| <b>emd-33243</b> | <b>7xk4</b> | <b>3.10</b>         |
| emd-33244        | 7xk5        | 3.10                |
| emd-33245        | 7xk6        | 3.00                |
| emd-33305        | 7xmu        | 2.30                |
| <b>emd-33306</b> | <b>7xmv</b> | <b>2.60</b>         |
| emd-33309        | 7xn3        | 2.90                |
| emd-33310        | 7xn4        | 3.35                |
| emd-33311        | 7xn5        | 3.18                |
| emd-33312        | 7xn6        | 3.45                |
| <b>emd-33331</b> | <b>7xnz</b> | <b>3.60</b>         |
| emd-33348        | 7xoh        | 3.60                |
| emd-33430        | 7xsp        | 2.89                |
| emd-33431        | 7xsq        | 2.88                |
| emd-33432        | 7xsr        | 2.97                |
| emd-33433        | 7xss        | 3.20                |

| EMDB entry       | PDB code    | Reported resolution |
|------------------|-------------|---------------------|
| emd-33439        | 7xt4        | 3.08                |
| emd-33528        | 7xzi        | 2.77                |
| emd-33529        | 7xzi        | 2.97                |
| emd-33540        | 7y0d        | 3.10                |
| emd-33621        | 7y5n        | 3.45                |
| emd-33676        | 7y80        | 2.71                |
| emd-33677        | 7y81        | 2.54                |
| emd-33678        | 7y82        | 2.83                |
| emd-33719        | 7yat        | 2.20                |
| emd-33802        | 7yfb        | 3.19                |
| emd-33807        | 7yg4        | 3.10                |
| emd-33853        | 7yi8        | 2.70                |
| emd-33854        | 7yi9        | 2.60                |
| <b>emd-33861</b> | <b>7yim</b> | <b>2.60</b>         |
| emd-33955        | 7yn9        | 3.53                |
| emd-33956        | 7yna        | 3.64                |
| emd-33957        | 7ynb        | 3.46                |
| emd-33958        | 7ync        | 3.14                |
| emd-33959        | 7ynd        | 3.29                |
| <b>emd-34017</b> | <b>7ypx</b> | <b>3.12</b>         |
| emd-34023        | 7yqc        | 2.82                |
| emd-34024        | 7yqd        | 3.40                |
| emd-14714        | 7zgx        | 2.88                |
| <b>emd-14716</b> | <b>7zh0</b> | <b>3.20</b>         |
| <b>emd-14725</b> | <b>7zh6</b> | <b>3.67</b>         |
| emd-14733        | 7zhj        | 3.53                |
| emd-14774        | 7zll        | 2.50                |
| emd-14777        | 7zll        | 3.45                |
| emd-14842        | 7zny        | 3.26                |
| emd-14847        | 7zol        | 3.03                |
| emd-14848        | 7zoq        | 3.20                |
| emd-14869        | 7zqb        | 3.88                |
| emd-14873        | 7zqp        | 3.60                |
| emd-15039        | 7zzq        | 2.60                |
| emd-15043        | 8a00        | 2.60                |
| emd-15044        | 8a01        | 3.20                |
| emd-15046        | 8a03        | 3.20                |
| <b>emd-15047</b> | <b>8a04</b> | <b>3.20</b>         |

| EMDB entry       | PDB code    | Reported resolution |
|------------------|-------------|---------------------|
| emd-15048        | 8a05        | 3.40                |
| <b>emd-15220</b> | <b>8a7d</b> | <b>3.06</b>         |
| emd-15285        | 8a9l        | 2.20                |
| emd-15361        | 8ade        | 2.78                |
| emd-15370        | 8adu        | 3.24                |
| emd-15378        | 8ae1        | 3.25                |
| emd-15540        | 8ane        | 3.20                |
| <b>emd-15560</b> | <b>8ap7</b> | <b>2.70</b>         |
| <b>emd-15561</b> | <b>8ap8</b> | <b>3.70</b>         |
| emd-15635        | 8at6        | 3.70                |
| emd-15646        | 8atd        | 3.10                |
| emd-15673        | 8aur        | 3.47                |
| emd-15684        | 8avv        | 3.40                |
| emd-15685        | 8avw        | 3.62                |
| <b>emd-15686</b> | <b>8avx</b> | <b>3.50</b>         |
| emd-15690        | 8aw3        | 3.60                |
| emd-15785        | 8b0j        | 3.99                |
| emd-15930        | 8b9f        | 3.93                |
| <b>emd-15960</b> | <b>8bc2</b> | <b>2.60</b>         |
| emd-16183        | 8bqe        | 3.50                |
| emd-15949        | 8bsh        | 3.80                |
| emd-16437        | 8c5i        | 3.15                |
| emd-16511        | 8c9m        | 3.20                |
| <b>emd-26973</b> | <b>8csw</b> | <b>2.50</b>         |
| emd-26974        | 8csx        | 2.40                |
| emd-26976        | 8csz        | 3.20                |
| emd-26978        | 8ct2        | 3.10                |
| emd-26993        | 8ctk        | 3.52                |
| emd-26994        | 8ctl        | 3.10                |
| emd-27020        | 8cvx        | 3.50                |
| emd-27021        | 8cvy        | 3.60                |
| <b>emd-27022</b> | <b>8cvz</b> | <b>3.52</b>         |
| emd-27104        | 8d0b        | 3.43                |
| emd-27138        | 8d1v        | 2.82                |
| emd-27173        | 8d43        | 2.88                |
| emd-27175        | 8d45        | 2.62                |
| emd-27252        | 8d8n        | 3.60                |
| emd-27253        | 8d8o        | 3.35                |

| EMDB entry       | PDB code    | Reported resolution |
|------------------|-------------|---------------------|
| emd-27320        | 8dc2        | 2.99                |
| emd-27421        | 8dgc        | 3.40                |
| <b>emd-27431</b> | <b>8dh7</b> | <b>2.99</b>         |
| emd-27542        | 8dmk        | 3.70                |
| <b>emd-27574</b> | <b>8dnm</b> | <b>2.76</b>         |
| emd-27639        | 8dpn        | 2.49                |
| emd-27645        | 8dq0        | 3.74                |
| emd-27656        | 8dql        | 3.00                |
| emd-27661        | 8dqv        | 1.52                |
| <b>emd-27755</b> | <b>8dwi</b> | <b>3.40</b>         |
| emd-27758        | 8dws        | 3.73                |
| <b>emd-27760</b> | <b>8dwu</b> | <b>3.40</b>         |
| emd-27761        | 8dwv        | 3.60                |
| emd-27795        | 8dze        | 2.99                |
| emd-27796        | 8dzf        | 3.69                |
| emd-27797        | 8dzg        | 3.10                |
| emd-27875        | 8e40        | 3.57                |
| <b>emd-27899</b> | <b>8e50</b> | <b>3.67</b>         |
| emd-27903        | 8e55        | 3.85                |
| emd-27936        | 8e76        | 2.51                |
| emd-27937        | 8e78        | 2.77                |
| emd-27945        | 8e8o        | 2.77                |
| emd-28064        | 8eex        | 2.95                |
| emd-28065        | 8eey        | 2.53                |
| emd-28080        | 8efd        | 3.80                |
| <b>emd-28081</b> | <b>8efe</b> | <b>3.80</b>         |
| emd-28129        | 8egs        | 3.92                |
| emd-28233        | 8em4        | 2.83                |
| emd-28241        | 8em7        | 2.97                |
| emd-28244        | 8emc        | 3.60                |
| emd-28248        | 8emh        | 3.63                |
| <b>emd-28637</b> | <b>8evu</b> | <b>2.58</b>         |
| emd-28641        | 8ew3        | 2.65                |
| emd-28660        | 8exr        | 3.80                |
| emd-28666        | 8ey2        | 3.50                |
| emd-28781        | 8f0u        | 3.10                |
| emd-28866        | 8f5o        | 3.50                |
| emd-28867        | 8f5p        | 3.40                |

| EMDB entry       | PDB code    | Reported resolution |
|------------------|-------------|---------------------|
| emd-29289        | 8fm9        | 3.20                |
| <b>emd-29290</b> | <b>8fma</b> | <b>3.10</b>         |
| emd-29323        | 8fnt        | 2.52                |
| emd-29326        | 8fnu        | 2.50                |
| emd-29327        | 8fnv        | 2.11                |
| emd-34158        | 8gna        | 2.80                |
| emd-34270        | 8gu6        | 3.10                |
| emd-31702        | 8h03        | 2.80                |
| emd-31704        | 8h05        | 3.40                |
| emd-34430        | 8h1p        | 3.48                |
| emd-34678        | 8hdr        | 3.66                |
| emd-34679        | 8hds        | 3.57                |
| emd-34738        | 8hgg        | 3.64                |
| emd-34963        | 8hr8        | 3.30                |
| emd-34965        | 8hra        | 3.76                |
